# Supplementary material
Source: ML conference proceedings conference paper supplement (https://openaccess.thecvf.com/content/CVPR_2020/html/Sundermeyer_Multi-Path_Learning_for_CVPR_2020_paper.html)
Supplement: Supplementary file 2 [file Sundermeyer_Multi-Path_Learning_for_CVPR_2020_supplemental.zip]

Archive with 1 entries (1 files):
- 08404_appendix.pdf
